# Supplementary material for: Synthesis and structure of [{Sn(μ–PCy)}3(Na·PMDETA)2], containing an electron-deficient [{Sn(μ–PCy)}3]2−dianion
Source: Royal Society of Chemistry journal article supplement (doi:10.1039/b300522d), 2003-01-01
Supplement: b300522d.doc [file b300522d.doc]

**Synthesis and Structure of [{Sn(*µ*-PCy)}3(Na.PMDETA)2], Containing an Electron-Deficient [{Sn(*µ*-PCy)}3]2– Dianion**

Paula Alvarez-Bercedo,***a*** Andrew D. Bond,***a*** Robert Haigh,***a*** Alexander D. Hopkins,***a*** Gavin T. Lawson,***a*** Mary McPartlin,***b*** David Moncrieff,***c*** Marta E. Gonzalez Mosquera,***d*** Jeremy M. Rawson,***a*** Anthony D. Woods***a*** and Dominic S. Wright***a***,*

***a*** Chemistry Department, Cambridge University, Lensfield Road, Cambridge CB2 1EW (U.K.); phone [+44] (0)1223 763122, fax [+44] (0)1223 336362, e-mail dsw1000@cus.cam.ac.uk.

***b*** School of Chemistry, University of North London, London N7 8DB (U.K.).

***c*** School of Computational Science & Information Technology, Florida State University, Tallahassee, FL 32306-4120 (U.S.A).

***d*** Department of Organic and Inorganic Chemistry, Universidad de Oviedo, 33071 Oviedo (Spain).

***Supplementary Data***

# Experimental Procedure

† *Synthesis of* **1**: A suspension of BnNa (2.80g, 25.5 mmol) in toluene (80mL) was cooled to –78oC. CyPH2 (3.0mL, 25.5mmol) was added to the suspension and the mixture allowed to reach room temperature. A bright yellow suspension of CyPHNa was formed after stirring (12h). A suspension of Sn(NMe2)2 (1.54g, 8.5mmol) in toluene (20mL) was then added to the metallated phosphine at –78oC. The mixture became orange in colour and, after stirring at room temperature over night, a red suspension in a red solution was formed. PMDETA (excess, 4.0mL) was added slowly in order to dissolve most of the red solid. The mixture was then filtered through celite and the solution reduced in volume to *ca.* 20mL under vacuum. Storage at room temperature (2h) gave orange crystals of **1**. Yield (isolated crystalline) 0.40g (11%). IR (Nujol, NaCl), /cm-1 = 1162(m), 1150(m), 1026(s), 931(m), 880(w), 846(w), 784(m), 722(w). 1H NMR (d8-THF, +25oC, 400.16MHz), **= 2.37 (mult., 16H, -CH2CH2- PMDETA), 2.21 (s., 6H, MeN PMDETA), 2.16 (s., 24H, Me2N PMDETA), 0.8-1.8 (mult., 33H Cy). 31P NMR (+27oC, d8-THF, 161.9MHz), -65.2 (mult.), -184.6 (mult.) (*ca.* 1:1) [d6-DMSO, -37.8(s) (1J31P-119,117Sn *ca.* 919Hz), -72.7 (s., 1J(31P-119,117Sn) *ca.* 692Hz) (*ca.* 1:2)]. It did not prove possible to locate a 119Sn resonance for **1** in thf or DMSO, despite repeated attempts, presumably because of rapid relaxation. Satisfactory C, H, N, P analysis were obtained.

‡ *Crystal data for* **1**: C50H95N6Na2P3Sn3, *M* = 1275.28, monoclinic, space group *P*2(1)/*c*, *Z* = 4, *a*= 19.3877(2), *b*= 13.2005(2), *c* = 26.5244(4)Å, ** = 109.761(1), *V* = 6388.56(15)Å3, *µ*(Mo–K**) = 1.286mm–1, *T* = 180(2)K. Data were collected on a Nonius KappaCCD diffractometer. Of a total of 38602 reflections collected, 14519 were independent (*R*int = 0.040). The structure was solved by direct methods and refined by full-matrix least squares on *F*2 (G. M. Sheldrick, *SHELX 97*, Göttingen, **1997**). Final *R*1 = 0.034 [*I*>2**(*I*)] and *wR*2 = 0.080 (all data). The PMDETA ligand attached to Na(2) is disordered at one of the nitrogen atoms [N(4)] and at the attached Me groups. This was modelled with 50% occupancy at each site. X-ray data on **1** has been deposited with the Cambridge Crystallography Data Centre CCDC-194980.

¢ ***Ab Initio Calculations***

We apologize to the authors for not being able to include the full references to these programs in the main text, for reasons of maintaining the required two-page limit.

14. Gaussian 98, Revision A.11.2, M. J. Frisch, G. W. Trucks, H. B. Schlegel, G. E. Scuseria, M. A. Robb, J. R. Cheeseman, V. G. Zakrzewski, J. A. Montgomery, Jr., R. E. Stratmann, J. C. Burant, S. Dapprich, J. M. Millam, A. D. Daniels, K. N. Kudin, M. C. Strain, O. Farkas, J. Tomasi, V. Barone, M. Cossi, R. Cammi, B. Mennucci, C. Pomelli, C. Adamo, S. Clifford, J. Ochterski, G. A. Petersson, P. Y. Ayala, Q. Cui, K. Morokuma, N. Rega, P. Salvador, J. J. Dannenberg, D. K. Malick, A. D. Rabuck, K. Raghavachari, J. B. Foresman, J. Cioslowski, J. V. Ortiz, A. G. Baboul, B. B. Stefanov, G. Liu, A. Liashenko, P. Piskorz, I. Komaromi, R. Gomperts, R. L. Martin, D. J. Fox, T. Keith, M. A. Al-Laham, C. Y. Peng, A. Nanayakkara, M. Challacombe, P. M. W. Gill, B. Johnson, W. Chen, M. W. Wong, J. L. Andres, C. Gonzalez, M. Head-Gordon, E. S. Replogle, J. A. Pople, Gaussian, Inc., Pittsburgh PA, 2001.

19. R. J. Harrison, J. A. Nichols, T. P. Straatsma, M. Dupuis, E. J. Bylaska, G. I. Fann, T. L. Windus, E. Apra, W. de Jong, S. Hirata, M. T. Hackler, J. Anchell, D. Bernholdt, P. Borowski, T. Clark, D. Clerc, H. Dachsel, M. Deegan, K. Dyall, D. Elwood, H. Fruchtl, E. Glendening, M. Gutowski, K. Hirao, A. Hess, J. Jaffe, B. Johnson, J. Ju, R. Kendall, R. Kobayashi, R. Kutteh, Z. Lin, R. Littlefield, X. Long, B. Meng, T. Nakajima, J. Nieplocha, S. Niu, M. Rosing, G. Sandrone, M. Stave, H. Taylor, G. Thomas, J. van Lenthe, K. Wolinski, A. Wong, Z. Zhang, “NWChem”, A Computational Chemistry Package for Parallel Computers, Version 4.1 (2002), Pacific Northwest National Laboratory, Richland, Washington 99352-0999, USA.

**Table 1:** Selected optimized bond lengths and bond angles for [Sn(*µ*-PMe)]3Na2

| Model | Sn-Naa) | P-Naa) | Sn-Pa) | Sn-Sna) | Sn-P-Snb) | P-Sn-Pb) |
| --- | --- | --- | --- | --- | --- | --- |
| HF | 3.328 | 2.875 | 2.585 | 3.425 | 83.0 | 92.8 |
| B3LYP | 3.245 | 2.822 | 2.608 | 3.472 | 83.5 | 91.4 |
| MPW1K | 3.231 | 2.803 | 2.574 | 3.347 | 81.1 | 92.1 |

a) Bond lengths in Angstroms. b) Bond angles in degrees.

**Table 2:** Selected optimized bond lengths and bond angles for [Sn(*µ*-PMe)]32–

| Model | Sn-Pa) | Sn-Sna) | Sn-P-Snb) | P-Sn-Pb) |
| --- | --- | --- | --- | --- |
| HF | 2.611 | 3.268 | 77.5 | 99.3 |
| B3LYP | 2.642 | 3.279 | 76.7 | 98.7 |
| MPW1K | 2.604 | 3.209 | 76.1 | 98.7 |

1. Bond lengths in Angstroms. b) Bond angles in degrees.

**Table 3**: Natural Net Charge on Components

| Molecule | Sn | P | Methyl | Na(1)a) | Na(2)b) |
| --- | --- | --- | --- | --- | --- |
| [Sn(*µ*-PMe)]3Na2 | .149 | -.429 | -.229 | .858 | .670 |
| [Sn(*µ*-PMe)]32– | .068 | -.406 | -.329 | N/A | N/A |

a) Na bonded to Sn b) Na bonded to P
